# Supplementary material for: Fabrication of a symbiotic polyvinyl alcohol-functionalized NiO/rGO nanoadsorbent for control of bisphenol-a removal
Source: Royal Society of Chemistry journal article supplement (doi:10.1039/d4nj00041b), 2024-01-01
Supplement: d4nj00041b1.pdf [file d4nj00041b1.pdf]

## Supporting Information

### **Fabrication of a Symbiotic Polyvinyl Alcohol-Functionalized NiO/rGO Nanoadsorbent for Control of Bisphenol-A Removal**

**Jamil A. Buledi<sup>1</sup>, Amber R. Solangi<sup>1\*</sup>, Ali Hyder<sup>1</sup>, Akbar Ali<sup>2</sup>, Arfana Mallah<sup>3</sup>, Sidra Amin<sup>4</sup>, Ayaz Ali Memon<sup>1</sup>, Khalid Hussain Thebo<sup>5,\*</sup>, Jun Yang<sup>2,\*</sup>, Mohsin Kazi<sup>6</sup>**

*<sup>1</sup>National Centre of Excellence in Analytical Chemistry, University of Sindh, Jamshoro 76080, Pakistan*

*<sup>2</sup>State Key Laboratory of Multiphase Complex Systems, Institute of Process Engineering (IPE), Chinese Academy of Sciences, Beijing 100F190, China*

*<sup>3</sup>M. A. Kazi Institute of Chemistry, University of Sindh, Jamshoro 76080, Pakistan*

*<sup>4</sup>Department of Chemistry, Shaheed Benazir Bhutto University, Shaheed Benazirabad-67450, Sindh, Pakistan*

*<sup>5</sup>Institute of Metal Research (IMR), Chinese Academy of Science, 2 Wenhua Road, Shenyang, China*

*<sup>6</sup>Department of Pharmaceutics, College of Pharmacy, POBOX-2457, King Saud University, Riyadh, 11451, Kingdom of Saudi Arabia*

Corresponding Author Emails: [ambersolangi@gmail.com](mailto:ambersolangi@gmail.com) (A.R.S.)\*

[khalidthebo@yahoo.com](mailto:khalidthebo@yahoo.com) (K.H.T.)\*

[jyang@ipe.ac.cn](mailto:jyang@ipe.ac.cn) (J.Y.)\*

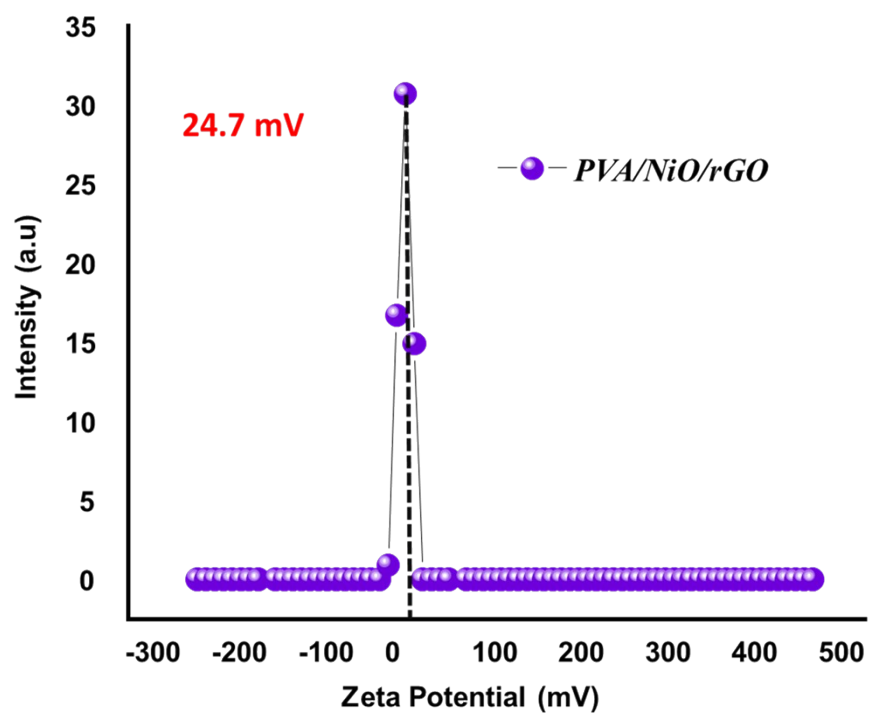

Fig. S1 Zeta potential of as-prepared PVA/NiO/rGO NSM.

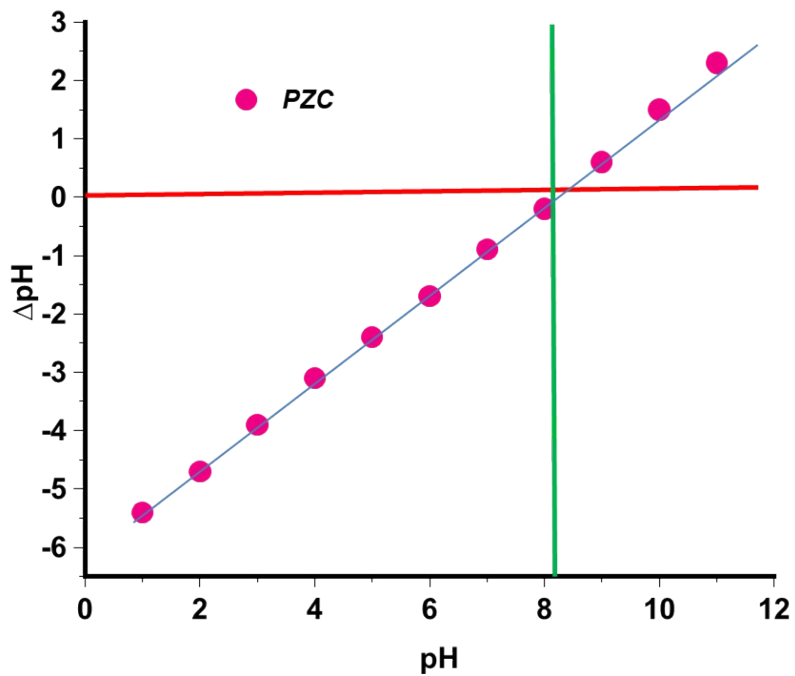

**Fig. S2** point of zero charge plot of PVA/NiO/rGO within the pH range from 1-11.

**Table S1** Thermodynamic measurements for **the**  $\Delta H^\circ$ ,  $\Delta S^\circ$  and  $\Delta G^\circ$  studies

| <b>Adsorbent</b>   | <b>T (K)</b> | <b><math>\Delta G^\circ</math><br/>(KJmol<sup>-1</sup>)</b> | <b><math>K_L</math></b> | <b><math>\Delta H^\circ</math><br/>(KJmol<sup>-1</sup>)</b> | <b><math>\Delta S^\circ</math><br/>(JK-1mol<sup>-1</sup>)</b> | <b>R<sup>2</sup></b> |
|--------------------|--------------|-------------------------------------------------------------|-------------------------|-------------------------------------------------------------|---------------------------------------------------------------|----------------------|
| <b>PVA/NiO/rGO</b> | 298          | -1.85                                                       | 2.02                    | 15.95                                                       | 56.38                                                         | 0.9804               |
|                    | 308          | -2.104                                                      | 2.5                     |                                                             |                                                               |                      |
|                    | 318          | -2.90                                                       | 2.9                     |                                                             |                                                               |                      |
